# Supplementary material
Source: MDPI journal article supplement (https://www.mdpi.com/2076-3417/10/7/2404)
Supplement: s1 [file s1]

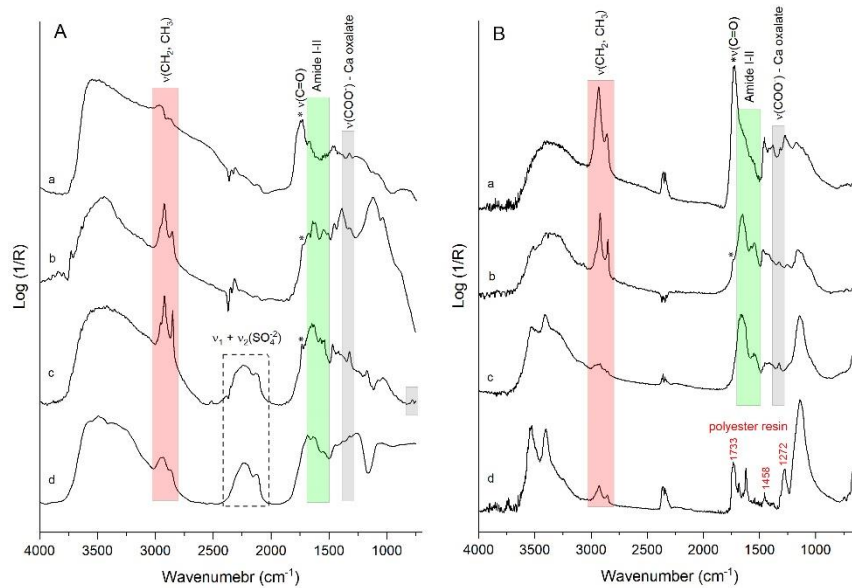

**Figure S1.** IR bands vibrational modes of the spectra acquired on different sampled paint fragments (see figure 8).
